# Supplementary material
Source: MDPI journal article supplement (https://www.mdpi.com/1660-4601/11/9/9835)

## Nitrogen and Phosphorus Removal from Wastewater Treatment Plant Effluent via Bacterial Sulfate Reduction in an Anoxic Bioreactor Packed with Wood and Iron

**Figure S1.** The relationship between decreased  $\text{NH}_4\text{-N}$  and increased  $\text{NO}_3\text{-N}$  in Reactor 1.

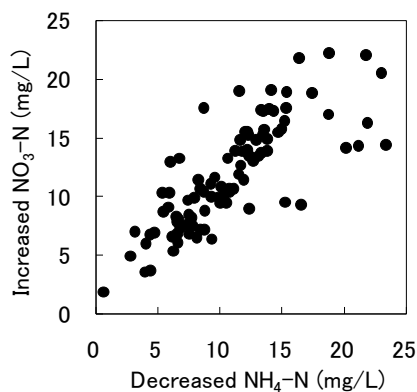

**Figure S2.** Time courses of  $\text{PO}_4\text{-P}$  removal efficiency per HRT, nitrogen removal efficiency per HRT and water temperature in Reactors 2-1 and 2-2.

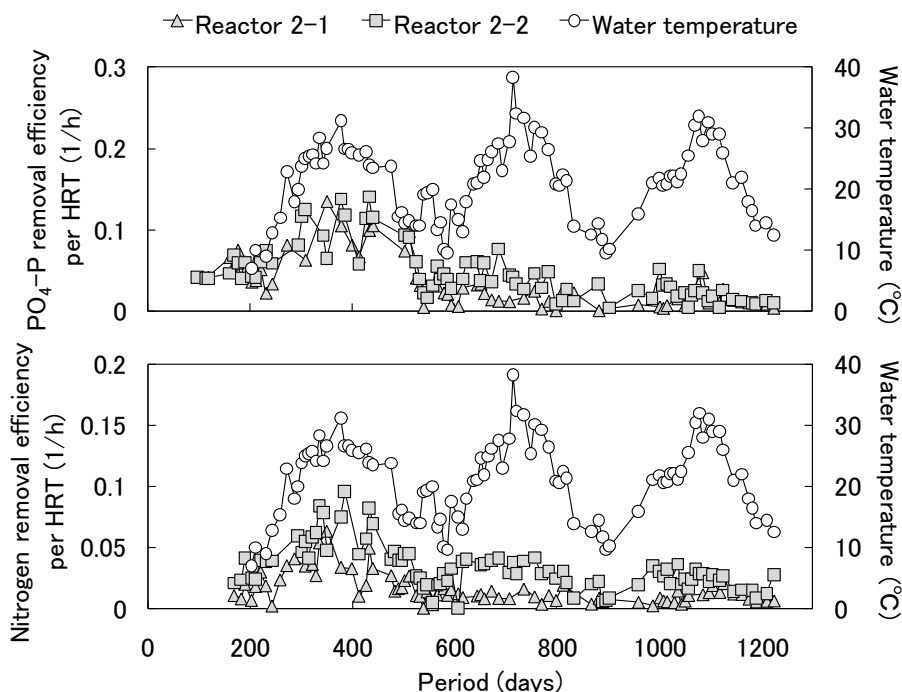

Supplement: s1 [file s1]
